# Supplementary material for: Factors associated with malaria microscopy diagnostic performance following a pilot quality-assurance programme in health facilities in malaria low-transmission areas of Kenya, 2014
Source: Springer Nature journal article supplement (doi:10.1186/s12936-017-2018-2), 2017-09-13
Supplement: MOESM2 [file 15056588]

**STANDARDIZED FORM FOR FACILITY INFORMATION AND SLIDES COLLECTION**

**1. HEALTH FACILITY INFORMATION**

**Health facility identification number** (*use the assigned unique code*) -----

**Health facility service level** (*observe the service charter and confirm with management: 2, 3, 4, 5*) -----

**Address: P.O.Box** -----

**E-mail**-----

**QA-pilot implementation status** (*Yes/No*) -----

**Region** (*Central, Eastern, Rift Valley*) -----

**County**-----

**Epidemiological zone**-----**Location** (*Urban/Rural*) -----

**Head of health facility** (*name facility in-charge or medical superintendent*) -----

-----

**E-mail** ----- **Tel** -----

**Head of Laboratory** -----

**E-mail** ----- **Tel** -----

**SLAMTA/SLIPTA/ WHO-AFRO Registration** (*Yes/No*) ----- **Other accreditation body** (*specify*) -----

**Number of practicing Lab. techs in the health facility laboratory** -----

**Date of visit/ data collection** -----

**Data collected by** -----

## 2. DOCUMENTS AND RECORDS

Confirm availability of the following:

| <b>Quality essentials</b>                                  | <b>Y</b> | <b>P</b> | <b>N</b> |
|------------------------------------------------------------|----------|----------|----------|
| 1. Malaria blood film (MBF) sample collection SOP present. |          |          |          |
| 2. MBF preparation SOP present.                            |          |          |          |
| 3. MBF reading and quantification SOP present.             |          |          |          |
| 4. MBF staining SOP present.                               |          |          |          |
| 5. Species reference charts (micrographs).                 |          |          |          |
| 6. Staining procedure job aid.                             |          |          |          |
| 7. Parasite quantification job aid.                        |          |          |          |
| 8. Giemsa stain preparation SOP present.                   |          |          |          |
| 9. PH 7.0-7.2 buffer preparation SOP present.              |          |          |          |
| 10. Internal quality control for stains documented.        |          |          |          |
| 11. Microscope maintenance logs complete.                  |          |          |          |
| 12. Test results logbook complete.                         |          |          |          |
| 13. Occurrence book available and complete.                |          |          |          |
| 14. Slide easily traceable                                 |          |          |          |
